# Supplementary material for: Super-Suppression of Long-Wavelength Phonons in Constricted Nanoporous Geometries
Source: MDPI journal article supplement (doi:10.3390/nano14090795), 2024-05-03
Supplement: s1 [file s1]

# Super-suppression of long wavelength phonons in constricted nanoporous geometries

## Supporting information

**Table S 1:** Table of geometric features for porous systems with spherical pores.  $r$  is a measurement of the radius of the pore,  $d$  measures the distances between pores lengthwise (black double pointed arrow in blue geometry), and  $L$  measures the distance from the center of one pore to the center of the pore above (black line in blue geometry).

| Pores                                                                               | $r$ (nm) | $d$ (nm) | $L$ (nm) |
|-------------------------------------------------------------------------------------|----------|----------|----------|
| 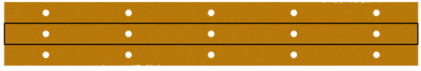   | 0.87     | 20.0     | 5.44     |
|    | 0.87     | 20.0     | 5.44     |
|    | 1.63     | 51.0     | 5.26     |
|    | 1.37     | 8.0      | 5.34     |
|  | 1.37     | N/A      | 5.34     |
|  | 3.67     | 46.8     | 7.64     |

**Table S 2:** Table of geometric features for porous systems with spherical voids. The measurements of  $r$ ,  $d$  and  $L$  are the same as shown in **Table S1**. For the measurements of  $d$  with asterisks, that indicates the distance has been measured from one cluster of pores to the next cluster of pores lengthwise.

| Voids                                                                               | $r$ (nm) | $d$ (nm) | $L$ (nm) |
|-------------------------------------------------------------------------------------|----------|----------|----------|
| 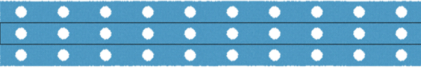 | 1.56     | 7.8      | 5.6      |
|  | 1.56     | N/A      | 5.6      |
|  | 1.56     | 1.62*    | 5.6      |
|  | 1.53     | 1.62*    | 5.4      |

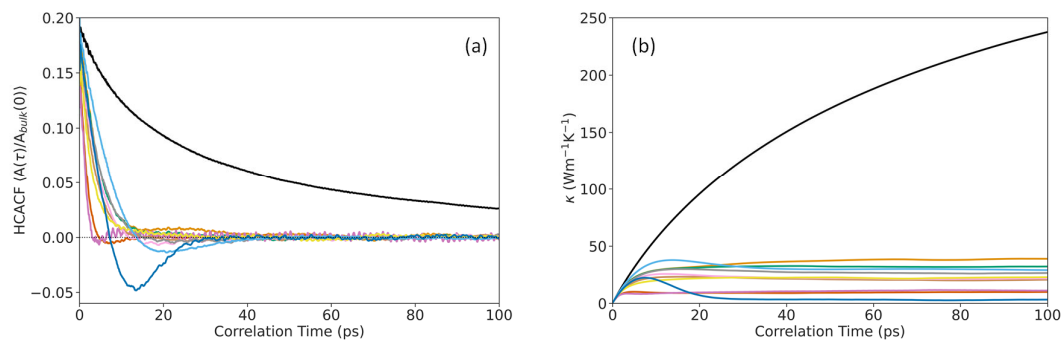

Fig. S1: A plot showing the full range of the pristine thermal conductivity and the thermal conductivity of the porous materials studied: a) the HCACF. B) The cumulative HCACF which sums up to the thermal conductivity of the different materials.
